# Supplementary material
Source: Springer Nature journal article supplement (https://www.springermedizin.de/resource/supplementary/13054_2012_1703_MOESM3_ESM.pdf/9711306)

**A**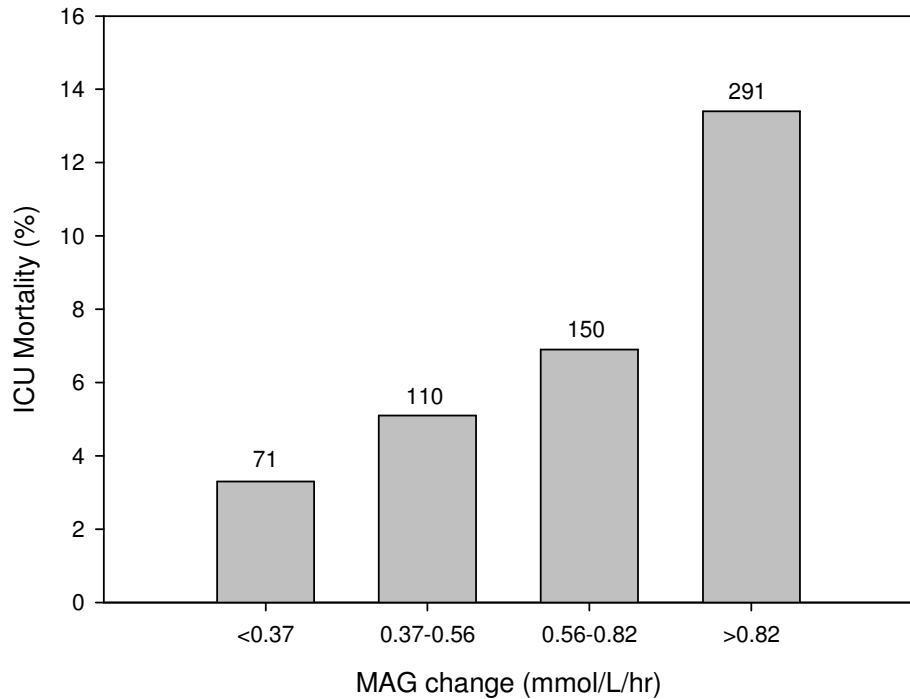**B**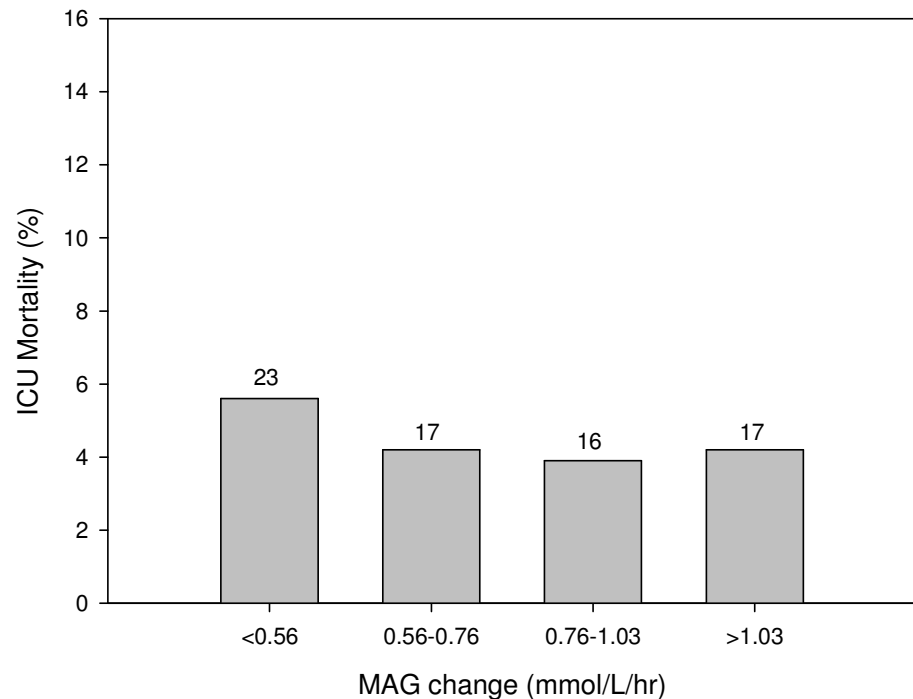

Supplement: MOESM3 [file 9711306]
